# Supplementary material for: Characterization and function of medium and large extracellular vesicles from plasma and urine by surface antigens and Annexin V
Source: PeerJ journal article supplement (doi:10.7717/peerj-achem.4), 2020-01-30
Supplement: Supplementary_tableS6_Urine.csv [file Supplementary_tableS6_Urine.csv]

Supplementary Table S6 List of the proteins utilized for gene-enrichment analysis about urine m/l EVs.
We show the list which Log10(P-value) became lower than -30. Category: Classification of GO Terms, Term: GO term identifier, Description: Term name, Log10(P-value): -2 represents 0.01, the more negative the better, InTerm_InList: #Genes of Upload Hit List in this Term / #Genes of Genome in this Term, Symbols: List of Symbols of upload hits in this term.
Category	GO Biological Processes
Term	GO:0045055
Description	regulated exocytosis
Log10(P-value)	-81.6
InTerm_InList	234/789
Symbols	SERPINA3,AOC1,ACLY,ACPP,ACTN4,ACTN1,ADAM8,AP2A2,AP1G1,AGA,AHSG,ALAD,ALB,ALDH3B1,ALDOA,ALDOC,ANPEP,ANXA2,ANXA3,ANXA5,APEH,APOA1,APRT,RHOA,RHOG,ASAH1,ATP6V0C,ATP6V0A1,BCR,CEACAM1,CACNA1D,CALM1,CAMK2A,CAPN1,CAT,CD9,CD14,CD47,CD59,CD63,CDA,CTSC,CLU,CNN2,CR1,MAPK14,CSNK2B,CST3,CSTB,CTSB,CTSD,CTSZ,CD55,CFD,CYB5R3,DYNC1H1,EEF1A1,EEF2,EGF,SERPINB1,STOM,STX2,F5,FGB,FLNA,FRK,FTH1,GAS6,GDI2,GLB1,GNAI2,GNS,G…
Category	GO Biological Processes
Term	GO:0030029
Description	actin filament-based process
Log10(P-value)	-58.3
InTerm_InList	194/733
Symbols	ACTB,ACTN4,ACTN1,ADD1,ADD3,ALDOA,BIN1,ANXA1,APOA1,ARF6,RHOA,RHOB,RHOC,RHOG,ARHGAP6,ARHGDIA,ARHGDIB,ATP1A1,BCR,CACNA1D,CACNA2D1,CAPG,CAPZA1,CAPZA2,CAPZB,CD47,CDC42,CFL1,CFL2,CNN2,CNN3,DBN1,DIAPH2,DMD,CTTN,EPS8,PTK2B,FLNA,FLNB,GMFB,GRB2,GSN,HIP1,HRG,ID1,ITGB1,KRAS,KRT8,KRT19,LRP1,TACSTD2,MARCKS,MYO1B,MYH3,MYH9,MYH10,MYL6,MYO1C,MYO1E,MYO5A,MYO6,NEB,NF2,NPHS1,PAFAH1B1,PAK1,PRKN,PFN1,PFN2,PKP2,PLS1,PL…
Category	Reactome Gene Sets
Term	R-HSA-5653656
Description	Vesicle-mediated transport
Log10(P-value)	-57.5
InTerm_InList	183/667
Symbols	ACTB,AP2A1,AP2A2,AP1B1,AP2B1,AP1G1,ALB,AMBP,BIN1,APOA1,APOE,ARF3,ARF6,CALM1,CAPZA1,CAPZA2,CAPZB,SCARB1,SCARB2,CD59,CENPE,CTSC,AP2M1,AP1S1,CLTA,CLTC,COL4A2,COPA,CTSZ,CD55,DCTN1,DYNC1H1,DYNC1I2,DNM2,EGF,CTTN,EPS15,F5,FOLR1,FTH1,GDI1,GDI2,GNS,GOLGA4,SFN,GRB2,HBA1,HBB,HIP1,HPX,HSPA8,HSP90AA1,KIF5B,LRP1,LRP2,MAN1A1,RAB8A,MYH9,MYO1C,MYO5A,MYO6,NEDD8,NSF,PAFAH1B1,PAFAH1B3,RAB1A,RAB5A,RAB5B,RAB6A,RAB13,R…
Category	GO Biological Processes
Term	GO:0051186
Description	cofactor metabolic process
Log10(P-value)	-48.9
InTerm_InList	154/555
Symbols	ACLY,AHCY,ALAD,ALDOA,ALDOB,ALDOC,AKR1B1,AMBP,APOA4,ATIC,BHMT,BLVRA,BLVRB,BPGM,CALM1,CAT,CBR3,COX15,CPOX,DBI,AKR1C1,CYB5R3,DPEP1,ENO1,ACSL4,FASN,FBP1,FOLH1,FOLR1,G6PD,GALK1,GAMT,GAPDH,GART,GGT1,GCLC,GCLM,GLO1,GOT1,GPD1,GPI,GPX1,GPX4,GSR,GSS,GSTA1,GSTM2,GSTM3,GSTP1,GSTT1,HAGH,HBA1,HBB,HPX,HSP90AA1,IDH1,IREB2,EIF6,LDHA,MAT2A,MDH1,MTHFD1,MTR,MVD,MVK,PNP,SLC11A2,NT5E,PRDX1,PCBD1,PFKL,PFKM,PFKP,PGAM1,P…
Category	Reactome Gene Sets
Term	R-HSA-382551
Description	Transport of small molecules
Log10(P-value)	-37.8
InTerm_InList	161/723
Symbols	ACO1,ADCY5,ADCY9,ADD1,ADD3,AP2A1,AP2A2,AP2B1,ALB,APOA1,APOC3,APOD,APOE,AQP2,ATP1A1,ATP12A,ATP1B1,ATP2B3,ATP6V1A,ATP6V1B1,ATP6V1B2,ATP6V0C,ATP6V1C1,ATP6V1E1,ATP6V0A1,BSG,CA2,CA4,CALM1,CAMK2A,SCARB1,AP2M1,CLTA,CLTC,EIF2S1,STOM,FTH1,GNAS,GNB1,GNB2,GNG7,HBA1,HBB,IREB2,MYO5B,NEDD8,SLC11A2,P4HB,SLC26A4,ATP8B1,ABCB1,PRKACG,PRKAR1A,PRKAR2A,PSMA1,PSMA2,PSMA3,PSMA4,PSMA5,PSMA6,PSMB1,PSMB4,PSMB6,PSMC2,PSMC3…
Category	Reactome Gene Sets
Term	R-HSA-109582
Description	Hemostasis
Log10(P-value)	-36.5
InTerm_InList	145/621
Symbols	SERPINA3,ACTB,ACTN4,ACTN1,AHSG,ALB,ALDOA,ANGPT1,ANXA2,ANXA5,APOA1,RHOA,RHOB,RHOG,ATP1B1,ATP2B3,CEACAM1,BSG,CALM1,CAPZA1,CAPZA2,CAPZB,CD9,CD47,CD63,CDC42,CEACAM5,CENPE,CFL1,CLU,MAPK14,CFD,EGF,F2,F5,FGB,FLNA,GAS6,GNA11,GNAI1,GNAI2,GNAI3,GNAQ,GNAS,GNB1,GNB2,GNG7,GP5,GRB2,GRB7,GRB14,HBB,SERPIND1,HRG,ITGAV,ITGB1,ITPR3,KIF5B,KNG1,KRAS,LAMP2,LGALS3BP,LYN,MIF,NRAS,P2RX4,SERPINA5,PFN1,SERPINB6,PLCG2,PLG,P…
Category	GO Biological Processes
Term	GO:0017144
Description	drug metabolic process
Log10(P-value)	-35
InTerm_InList	164/784
Symbols	ACLY,ACO1,ACP5,ACPP,ADH1C,ADH5,ADK,ADSL,ADSS,AK1,ALDH1A1,ALDH3B1,ALDOA,ALDOB,ALDOC,AKR1B1,AOX1,APOA4,APRT,RHOA,ASS1,ATP1B1,ATP5F1A,ATP5F1B,ATP6V1A,ATP6V1B1,ATP6V1B2,BHMT,BPGM,CAT,CBR1,CD47,CKB,CLU,COMT,COX15,CTH,CYP27B1,DDC,AKR1C1,NQO1,DNM2,DPEP1,DPYS,ENO1,EPHX2,ESD,FAH,PTK2B,FBP1,FOLR1,GALK1,GAMT,GAPDH,GART,NIPSNAP2,GGT1,GPD1,GPI,GPX1,GUK1,HBA1,HBB,HGD,HPRT1,HSPA1A,HSPA8,HSP90AA1,HSP90AB1,IDH1,I…
Category	GO Biological Processes
Term	GO:0120031
Description	plasma membrane bounded cell projection assembly
Log10(P-value)	-34.6
InTerm_InList	138/593
Symbols	ARF6,RHOG,ARL3,BBS1,BBS2,CAPZB,SEPT7,CDC42,DCTN1,DNAH5,DYNC1H1,DYNC1I2,DNM2,CTTN,EPS8,FLNA,GSN,HRG,HSP90AA1,ITGB1,TACSTD2,RAB8A,MYH10,SEPT2,P2RX4,PAFAH1B1,PALM,ATP8B1,PFN1,PFN2,PODXL,PPP2R1A,PRKCD,TWF1,PTPRO,RAB1A,RAB5A,RAC1,RALA,RAP1A,RAP1B,RAP1GAP,RAP2B,RDX,SDCBP,TROVE2,TGFB3,TUBA4A,VAV2,VCL,VDAC3,EZR,YWHAE,YWHAG,ALMS1,NCK2,CDK10,RAB11A,WASL,ATP6V0D1,SNAP29,SLC9A3R1,KIF3B,CKAP5,ACTR3,ACTR2,ARPC…
Category	Reactome Gene Sets
Term	R-HSA-422475
Description	Axon guidance
Log10(P-value)	-34.4
InTerm_InList	132/551
Symbols	ACTB,AP2A1,AP2A2,AP2B1,RHOA,RHOB,RHOC,CACNA1D,CDC42,CFL1,AP2M1,CLTA,CLTC,CNTN1,COL4A2,COL4A4,COL6A1,COL9A3,MAPK14,CSNK2A1,CSNK2B,DNM2,DPYSL2,GRB2,GRB7,GRIN1,HSPA8,HSP90AA1,HSP90AB1,ITGAV,ITGB1,KRAS,LAMC1,RPSA,LYN,MSN,MYH9,MYH10,MYL6,NRAS,PAK1,PAK2,PFN1,PFN2,PITPNA,PLXNA1,PRKACG,PRKAR2A,PRKCA,MAPK1,MAPK3,MAP2K2,PSMA1,PSMA2,PSMA3,PSMA4,PSMA5,PSMA6,PSMB1,PSMB4,PSMB6,PSMC2,PSMC3,PSMC6,PSMD2,PSMD4,PSM…
Category	GO Biological Processes
Term	GO:0060627
Description	regulation of vesicle-mediated transport
Log10(P-value)	-33.5
InTerm_InList	124/505
Symbols	ACTN4,AP2A1,AP2B1,AP1G1,AHSG,BIN1,ANGPT1,ANXA1,ANXA2,ANXA13,APOC3,APOE,ARF6,ARHGAP1,BCR,CEACAM1,C4A,CACNA1D,CALM1,CAMK2A,CD14,SCARB1,CD47,CD63,CD151,CLU,DNM2,EGF,FGB,GAS6,GNAI2,HIP1,ITGAV,KIF5B,LAMP1,LGALS3,LGALS9,LRP1,LYN,MAP2,RAB8A,MFGE8,MSN,NSF,PRKN,PFN2,PLCG2,PPT1,PRKAA1,MAPK1,MAPK3,MAP2K2,PTPRJ,RAB5A,RAB5B,RAB27A,RAB5C,RAC1,RALA,RALB,RAP1A,RAP1B,RDX,SDCBP,SH3GL2,SRC,STXBP1,STXBP2,STXBP3,SYK,…
Category	GO Biological Processes
Term	GO:0044403
Description	symbiont process
Log10(P-value)	-31.9
InTerm_InList	156/766
Symbols	AP2A1,AP2A2,AP1B1,AP2B1,AP1G1,ALB,AMBP,BIN1,ANPEP,SLC25A5,ANXA2,APCS,APOE,RHOA,ATP6V0C,C9,CALM1,SCARB1,SCARB2,CDC42,CDH1,CFL1,AP2M1,AP1S1,CR1,CTSB,CD55,DDB1,DYNC1I2,DPP4,EIF4A1,EIF4A2,STOM,EPS15,F2,FDPS,GAPDH,GAS6,GPX1,GRB2,GSN,CFH,HLA-DRA,HPX,HSPA1A,HSPA8,HSP90AB1,ITGAV,ITGB1,KPNB1,KRT8,KRT19,LAMP1,RPSA,LGALS1,LGALS9,LTF,LYN,OSBP,P4HB,PAK2,PRKN,PCBP1,CHMP1A,PI4KA,PLG,PLSCR1,PPIA,PKN2,MAPK1,MAPK3…
Category	Canonical Pathways
Term	M186
Description	PID PDGFRB PATHWAY
Log10(P-value)	-30.1
InTerm_InList	57/129
Symbols	ACTN4,RHOA,ARHGDIA,DNM2,CTTN,EPS8,SFN,GRB2,ITGAV,KRAS,LRP1,LYN,AFDN,NRAS,PAK1,PIN1,PPP2R1A,PRKCA,PRKCD,PRKCE,MAPK1,MAPK3,MAP2K2,PTPN11,PTPRJ,RAB5A,RAC1,RAP1A,RAP1B,MAP2K4,SHC1,SRC,STAT3,VAV2,YES1,YWHAB,YWHAE,YWHAG,YWHAH,YWHAZ,NCK2,IQGAP1,WASL,SLC9A3R2,SLC9A3R1,ABI1,ARPC5,ARPC4,ARPC3,ARPC1B,ACTR3,ACTR2,ARPC2,WASF2,BAIAP2,NCKAP1,YWHAQ
