# Supplementary figures and images for: Characterization and function of medium and large extracellular vesicles from plasma and urine by surface antigens and Annexin V
Source: PeerJ journal article supplement (doi:10.7717/peerj-achem.4), 2020-01-30

Supplementary Fig.S3

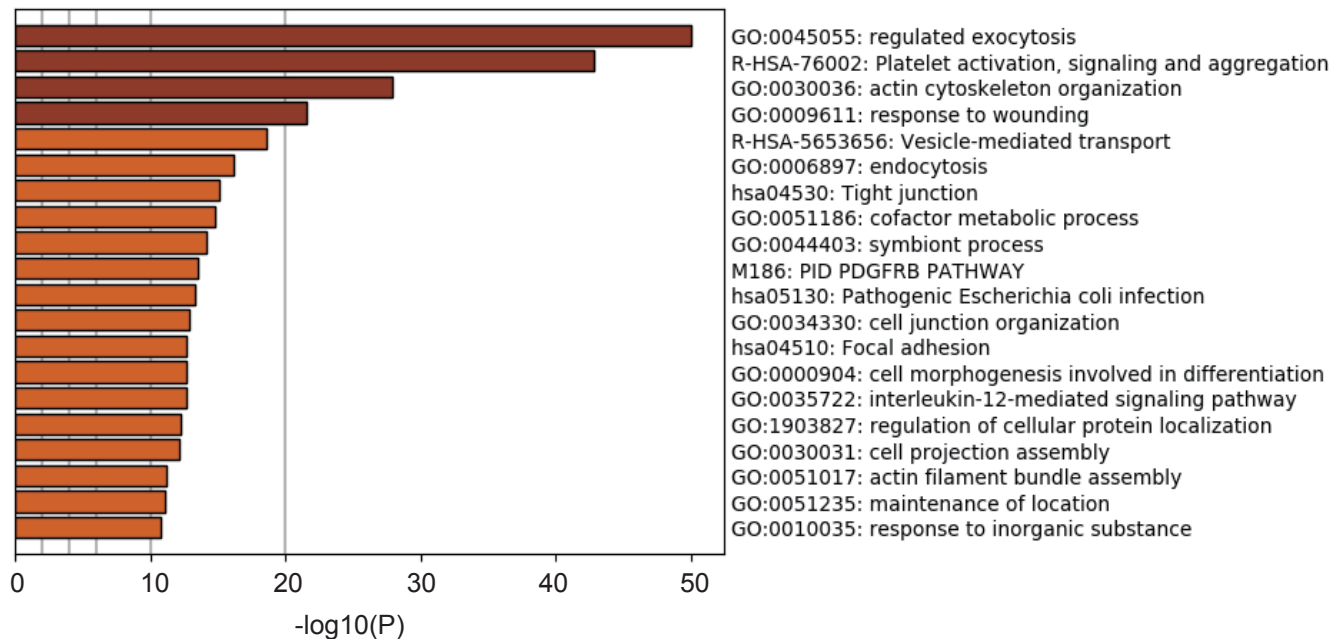

Supplement: Sup3.pdf [file Sup3.pdf]
